# Supplementary material for: Cross-linked luminescent films via electropolymerization of multifunctional precursors for highly efficient electroluminescence
Source: Royal Society of Chemistry journal article supplement (doi:10.1039/c3py21075h), 2013-01-01
Supplement: c3py21075h.pdf [file c3py21075h.pdf]

Supplementary Material (ESI) for Polymer Chemistry  
This journal is (c) The Royal Society of Chemistry 2013

## Electronic Supplementary Information

# Cross-linked, Luminescent Films via Electropolymerization of Multifunctional Precursors for High-efficient Electroluminescence

Ying Lv,<sup>b</sup> Liang Yao,<sup>b</sup> Cheng Gu,<sup>b</sup> Yuanxiang Xu,<sup>b</sup> Yunan Zhang,<sup>b</sup> Zengqi Xie,<sup>a</sup> Linlin Liu,<sup>a</sup>  
Yuguang Ma<sup>\*a,b</sup>

<sup>a</sup> Institute of Polymer Optoelectronic Materials and Devices, State Key Laboratory of Luminescent Materials and Devices, South China University of Technology, Guangzhou 510640, P. R. China, E-mail: [ygma@jlu.edu.cn](mailto:ygma@jlu.edu.cn)

<sup>b</sup> State Key Laboratory of Supramolecular Structure and Materials, Jilin University, Qianjin Avenue, Changchun, 130012, P. R. China.

## Contents

1. Synthesis and characterization of **OCPC**, **TCPC**, **DCPC**, **OCBzC** and **TCBzC**.....**S1**
2. Electrochemical property and PL spectra of **OCPC** and **TCPC**.....**Fig. S1**
3. Determination of molar absorption coefficient of **OCPC** and **TCPC** backbone.....**Fig. S2**
4. The measurement of  $D_0$  of **OCPC**, **TCPC** and **DCPC**.....**Fig. S3**
5. Electrochemical properties of **OCBzC** and **OCBzC**.....**Fig. S4**

### 1. Synthesis and characterization of OCPC, TCPC, DCPC, OCBzC and TCBzC.<sup>s1</sup>

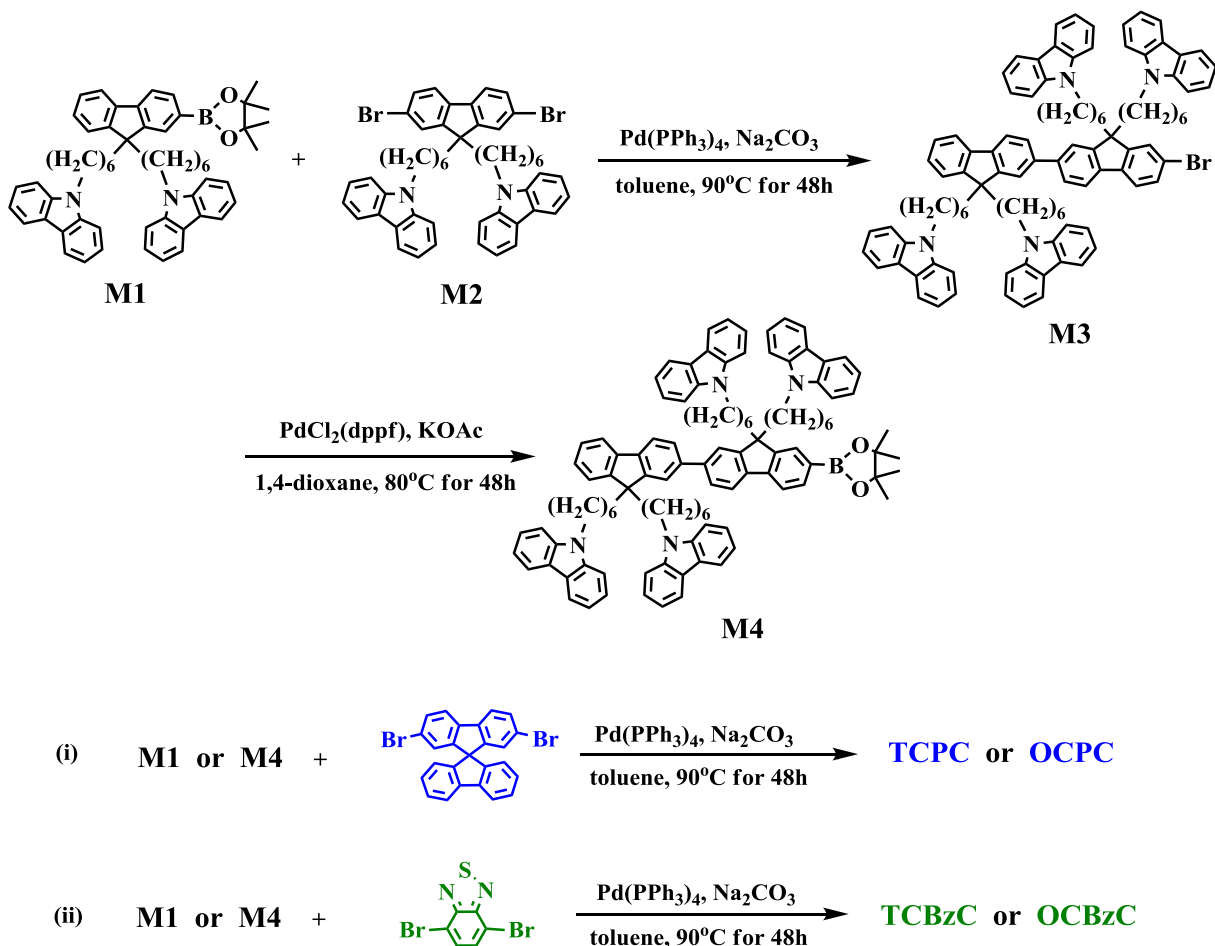

**Scheme S1.** Synthetic routes of OCPC, TCPC, OCBzC and TCBzC molecules.

**Scheme S1** illustrates the synthetic procedures for OCPC, TCPC, OCBzC and TCBzC. The monomer, 9,9',9''-(7-bromo-9H,9'H-[2,2'-bifluorene]-9,9,9',9'-tetrayl) tetrakis(hexane-6,1-diyl) tetrakis(9Hcarbazole) (**M3**), was prepared from the Suzuki coupling reaction of **M1** and **M2** in a biphasic system (toluene/aqueous  $\text{Na}_2\text{CO}_3$ ) using  $\text{Pd}(\text{PPh}_3)_4$  as catalyst.<sup>s2</sup> To prevent from generating excess byproduct, less ratio amount of **M1** (**M2** was 1.5 times by mol more than **M1**) was put into. The key intermediate, 4,4,5,5-tetramethyl-2-(9,9,9',9'-tetrakis(6-(9H-fluorene-9-yl)hexyl)-9H,9'H-[2,2'-bifluorene]-7-yl)-1,3,2-dioxaborolane (**M4**), was synthesized from **M3**, and the reaction was carried out between **M3** and 4,4,4',4',5,5',5''-octamethyl-2,2'-bi(1,3,2-dioxaborolane) catalyzed by  $\text{PdCl}_2(\text{dppf})$  in the presence of KOAc and 1,4-dioxane at 80°C for 48h. The boronic ester was purified by chromatography using silica support in the yield of 63%. Finally, T-series and O-series were synthesized via Suzuki coupling reaction similarly to **M3**. <sup>1</sup>H and <sup>13</sup>C, MS, and elemental analysis were employed to confirm the chemical structures of the final compounds. FCz was synthesized following a general method reported by Ma and characterized by NMR.

<sup>s2</sup>

**TCPC:** <sup>1</sup>H NMR (500 MHz,  $\text{CDCl}_3$ , 25°C, TMS):  $\delta=8.07\text{--}8.05$  (d,  $J=8.06$ , 8H; Ar-H),  $7.94\text{--}7.92$  (d,  $J=7.93$ , 2H; Ar-H),

7.80–7.79 (d,  $J=7.79$ , 2H; Ar-H), 7.67–7.65 (d,  $J=7.66$ , 2H; Ar-H), 7.63–7.61 (d,  $J=7.62$ , 2H; Ar-H), 7.58–7.57 (d,  $J=7.57$ , 2H; Ar-H), 7.40–7.29 (m, 16H; Ar-H), 7.26–7.24 (m, 8H; Ar-H), 7.22–7.17 (m, 12H; Ar-H), 7.08–7.07 (t,  $J=7.07$ , 2H; Ar-H), 6.99 (s, 2H; Ar-H), 6.85–6.83 (d,  $J=6.84$ , 2H; Ar-H), 4.10–4.09 (t,  $J=4.09$ , 8H; CH<sub>2</sub>), 1.88–1.84 (m, 8H; CH<sub>2</sub>), 1.64–1.58 (m, 8H; CH<sub>2</sub>), 1.12–1.02 (m, 16H; CH<sub>2</sub>), 0.57–0.52 ppm (m, 8H; CH<sub>2</sub>). MS (MALDI-TOF) mass ( $m/z$ ): 1642 [ $M^+$ ]. elemental analysis calcd (%) for C<sub>123</sub>H<sub>108</sub>N<sub>4</sub>: C, 89.96; H, 6.63; N, 3.41. Found: C, 89.73; H, 6.92; N, 3.36.

**TCBzC**: <sup>1</sup>H NMR (500 MHz, CDCl<sub>3</sub>, 25°C, TMS):  $\delta$ =8.04–8.03 (d,  $J=7.6$  Hz, 8H; Ar-H), 7.98–7.96 (d,  $J=7.9$  Hz, 2H; Ar-H), 7.91 (s, 2H, Ar-H), 7.86–7.84 (d,  $J=7.9$  Hz, 2H; Ar-H), 7.77–7.74 (m, 4H; Ar-H), 7.38–7.35 (m, 10H; Ar-H), 7.32–7.29 (m, 4H; Ar-H), 7.27–7.25 (d,  $J=7.6$  Hz, 8H; Ar-H), 7.17–7.14 (t,  $J=7.6$  Hz, 8H; Ar-H), 4.15–4.12 (t,  $J=7.3$  Hz, 8H; CH<sub>2</sub>), 2.05–1.93 (m, 8H; CH<sub>2</sub>), 1.71–1.65 (m, 8H; CH<sub>2</sub>), 1.19–1.10 (m, 16H; CH<sub>2</sub>), 0.80–0.68 ppm (m, 8H; CH<sub>2</sub>); <sup>13</sup>C NMR (125 MHz, CDCl<sub>3</sub>, 25°C, TMS):  $\delta$ =154.66 (C), 151.34 (C), 151.11 (C), 141.73 (C), 141.07 (C), 140.74 (C), 136.65 (C), 133.78 (C), 128.66 (CH), 128.27 (CH), 127.81 (CH), 127.44 (CH), 125.91 (CH), 124.23 (CH), 123.26 (CH), 123.14 (C), 120.68 (CH), 120.47 (CH), 120.23 (CH), 119.04 (CH), 109.00 (CH), 55.49 (C), 43.28 (CH<sub>2</sub>), 40.64 (CH<sub>2</sub>), 30.13 (CH<sub>2</sub>), 29.14 (CH<sub>2</sub>), 27.21 (CH<sub>2</sub>), 24.10 ppm (CH<sub>2</sub>); MS (MALDI-TOF) mass ( $m/z$ ): 1462 [ $M^+$ ]; elemental analysis calcd (%) for C<sub>104</sub>H<sub>96</sub>N<sub>6</sub>S: C, 85.44; H, 6.62; N, 5.75; found: C, 85.28; H, 6.95; N, 5.56.

**OCPC**: <sup>1</sup>H NMR (500 MHz, CDCl<sub>3</sub>, 25°C, TMS):  $\delta$ =8.03 (m, 16H; Ar-H), 7.95 (d,  $J=7.9$  Hz, 2H; Ar-H), 7.68 (m, 20H; Ar-H), 7.33 (m, 24H; Ar-H), 7.17 (m, 36H; Ar-H), 7.07 (t,  $J=7.6$  Hz, 2H; Ar-H), 7.01 (s, 2H; Ar-H), 6.85 (d,  $J=7.6$  Hz, 2H; Ar-H), 4.16 (m, 16H; CH<sub>2</sub>), 1.97 (m, 16H; CH<sub>2</sub>), 1.59 (m, 16H; CH<sub>2</sub>), 1.05 (m, 32H; CH<sub>2</sub>), 0.63 ppm (m, 16H; CH<sub>2</sub>); <sup>13</sup>C NMR (125 MHz, CDCl<sub>3</sub>, 25°C, TMS):  $\delta$ =151.79 (C), 151.63 (C), 150.94 (C), 150.31 (C), 149.17 (C), 142.27 (C), 141.77 (C), 141.10 (C), 140.73 (C), 140.43 (C), 140.27 (C), 128.38 (CH), 128.27 (CH), 127.64 (CH), 127.57 (CH), 127.36 (CH), 126.75 (CH), 126.62 (CH), 125.92 (CH), 124.76 (CH), 123.15 (C), 122.80 (CH), 121.50 (CH), 120.68 (CH), 120.51 (CH), 120.35 (CH), 120.25 (CH), 119.05 (CH), 108.99 (CH), 69.29 (C), 55.57 (C), 55.41 (C), 43.21 (CH<sub>2</sub>), 40.68 (CH<sub>2</sub>), 30.05 (CH<sub>2</sub>), 29.08 (CH<sub>2</sub>), 27.18 (CH<sub>2</sub>), 24.03 ppm (CH<sub>2</sub>); MS (MALDI-TOF) mass ( $m/z$ ): 2966 [ $M^+$ +H]; Anal. Calcd (%) for C<sub>221</sub>H<sub>200</sub>N<sub>8</sub>: C, 89.43; H, 6.79; N, 3.78; found: C, 89.32; H, 6.67; N, 3.89.

**OCBzC**: <sup>1</sup>H NMR (500 MHz, CDCl<sub>3</sub>, 25°C, TMS):  $\delta$ =8.04 (d,  $J=7.6$  Hz, 8H; Ar-H), 8.00 (d,  $J=7.6$  Hz, 10H; Ar-H), 7.94 (s, 2H, Ar-H), 7.79 (d,  $J=7.9$  Hz, 2H; Ar-H), 7.82 (d,  $J=7.9$  Hz, 2H; Ar-H), 7.74 (m, 6H; Ar-H), 7.64 (m, 6H; Ar-H), 7.59 (s, 2H; Ar-H), 7.34 (m, 18H; Ar-H), 7.25 (d,  $J=7.9$  Hz, 12H; Ar-H), 7.20 (d,  $J=8.2$  Hz, 8H; Ar-H), 7.17 (t,  $J=7.9$  Hz, 8H; Ar-H), 7.12 (t,  $J=7.3$  Hz, 8H; Ar-H), 4.09 (m, 16H; CH<sub>2</sub>), 1.99 (m, 16H; CH<sub>2</sub>), 1.63 (m, 16H; CH<sub>2</sub>), 1.11 (m, 32H; CH<sub>2</sub>), 0.71 ppm (m, 16H; CH<sub>2</sub>); <sup>13</sup>C NMR (125 MHz, CDCl<sub>3</sub>, 25°C, TMS):  $\delta$ =154.67 (C), 152.25 (C), 151.64 (C), 151.36 (C), 150.96 (C), 141.40 (C), 141.15 (C), 140.91 (C), 140.74 (C), 140.36 (C), 136.69 (C), 133.77 (C), 128.80 (CH), 128.29 (CH), 127.61 (CH), 127.40 (CH), 126.83 (CH), 126.66 (CH), 126.51 (CH), 126.39 (CH), 125.93 (CH), 124.36 (CH), 123.26 (CH), 123.14 (C), 121.63 (CH), 121.56 (CH), 120.70 (CH), 120.51 (CH), 120.30 (CH), 119.07 (CH), 108.99 (CH), 55.69 (C), 55.46 (C), 43.23 (CH<sub>2</sub>), 40.75 (CH<sub>2</sub>), 30.14 (CH<sub>2</sub>), 29.14 (CH<sub>2</sub>), 27.22 (CH<sub>2</sub>), 24.27 (CH<sub>2</sub>), 24.06 ppm (CH<sub>2</sub>); MS (MALDI-TOF) mass ( $m/z$ ): 2837 [ $M^+$ ]; Anal. Calcd (%) for C<sub>202</sub>H<sub>188</sub>N<sub>10</sub>S: C, 87.03; H, 6.80; N, 5.02; S, 1.15; found: C, 86.95; H, 6.60; N, 4.94; S, 1.23.

**DCPC**: <sup>1</sup>H NMR (500 MHz, CDCl<sub>3</sub>, 25°C, TMS):  $\delta$ =8.08–8.07 (d,  $J=8.07$ , 4H; Ar-H), 7.68–7.66 (d,  $J=7.67$ , 2H; Ar-H),

7.44–7.42 (t,  $J=7.42$ , 4H; Ar-H), 7.31–7.28 (m, 6H; Ar-H), 7.24–7.19 (m, 8H; Ar-H), 4.16–4.15 (t,  $J=4.15$ , 4H; CH<sub>2</sub>), 1.89–7.85 (m, 4H; CH<sub>2</sub>), 1.70–1.63 (m, 4H; CH<sub>2</sub>), 1.17–1.03 (m, 8H; CH<sub>2</sub>), 0.60–0.53 ppm (m, 4H; CH<sub>2</sub>).

## 2. 2. Electrochemical property and PL spectra of OCPC and TCPC.

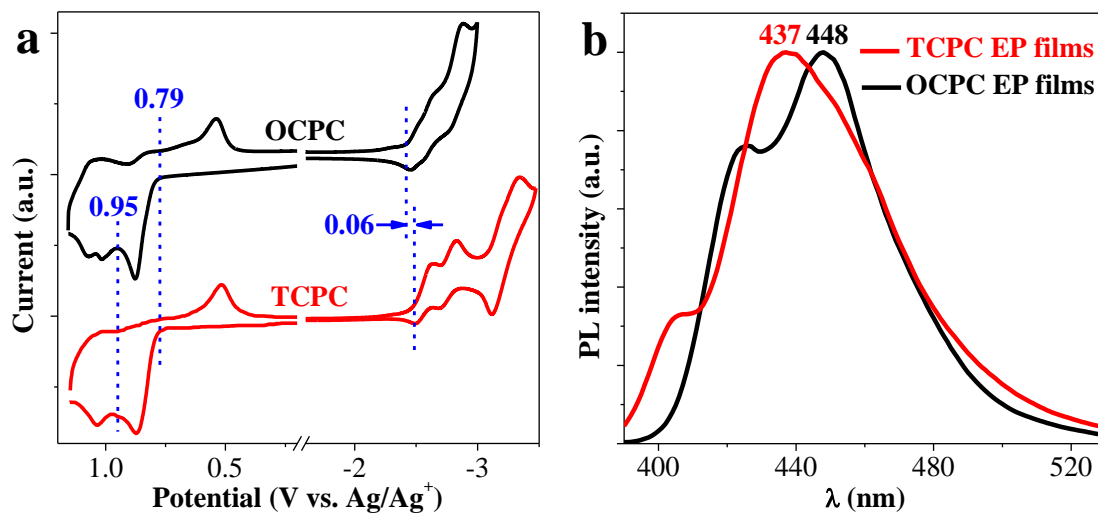

**Fig. S1.** a) CV curve of OCPC and TCPC for the first cycle; b) PL spectra of OCPC and TCPC EP films prepared at the scan range  $-0.80 \sim 0.85$  V and the scan rate  $50 \text{ mV s}^{-1}$  for 10 cycles, using  $\text{Bu}_4\text{NPF}_6$  ( $0.1 \text{ mol L}^{-1}$ ) as supporting electrolyte in  $\text{CH}_3\text{CN}/\text{CH}_2\text{Cl}_2$  ( $\text{V}/\text{V} = 2/3$ ) solution.

## 3. Determination of molar absorption coefficient of OCPC and TCPC backbone.

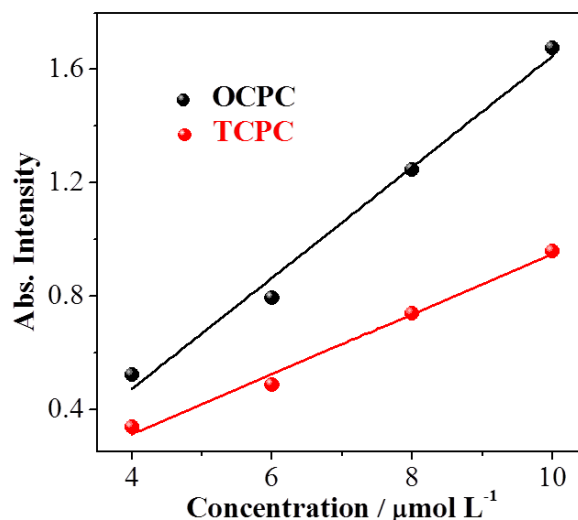

**Fig. S2.** Absorption intensities of OCPC and TCPC backbones with different concentration in  $\text{CH}_2\text{Cl}_2$ . According to the Lambert-Beer's law, the mean calculated molar absorption coefficients of OCPC and TCPC backbone are  $1.44 \times 10^5 \text{ L mol}^{-1}$

$\text{cm}^{-1}$  and  $8.72 \times 10^4 \text{ L mol}^{-1} \text{ cm}^{-1}$ , respectively.

#### 4. The measurement of $D_0$ of OCPC, TCPC and DCPC.

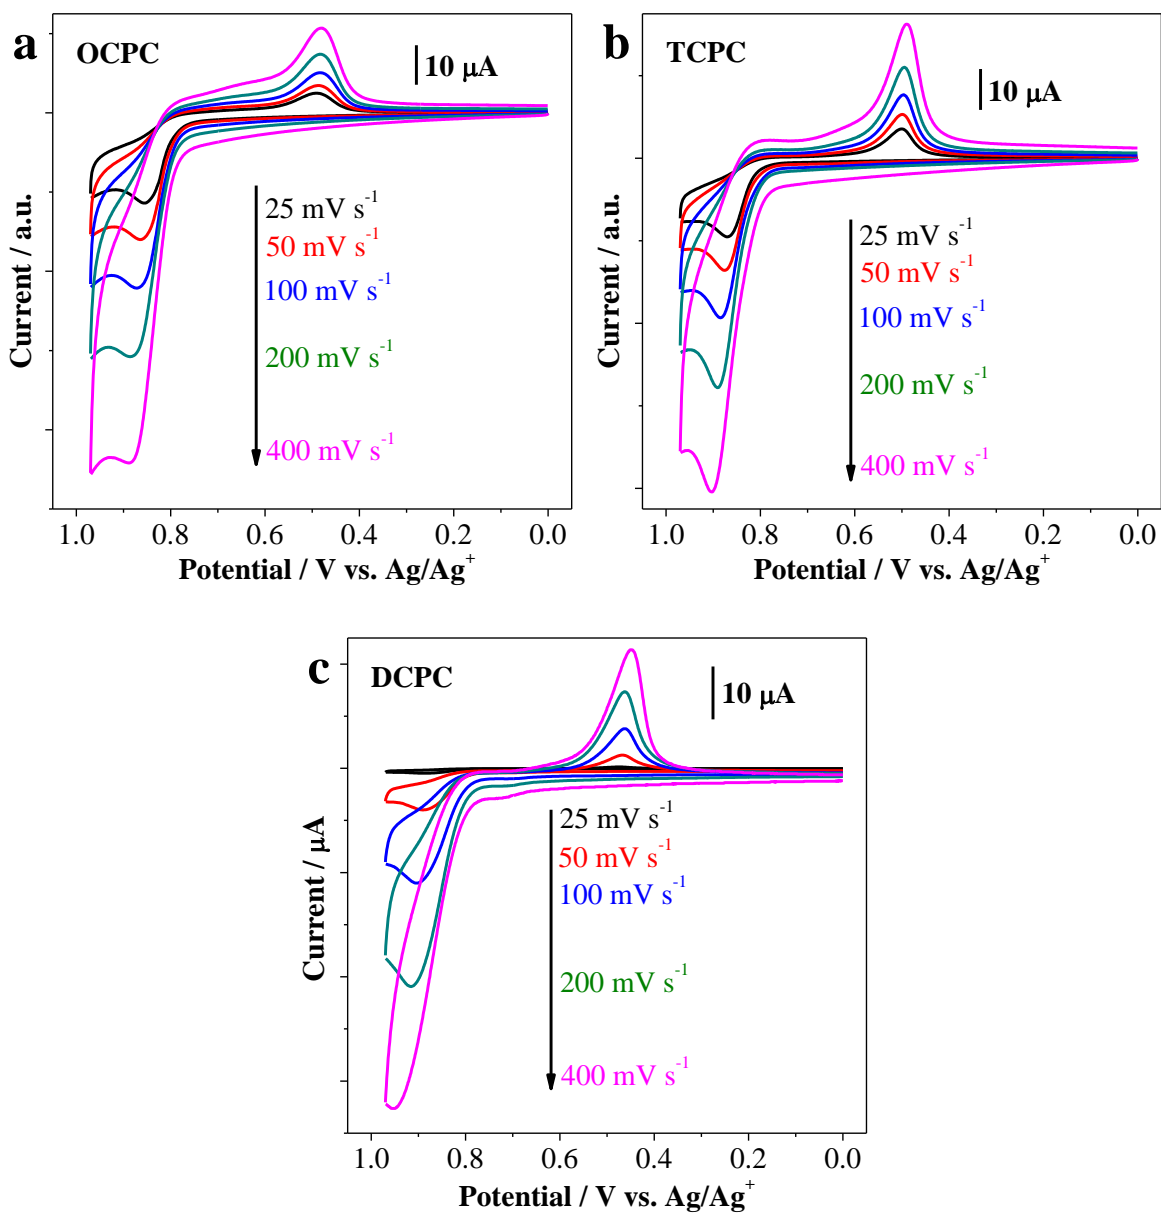

**Fig. S3.** CV curves of a) OCPC, b) TCPC, c) DCPC for the first cycle. The potential ranges from 0 to 0.97 V, and the scan rates are 25  $\text{mV s}^{-1}$ , 50  $\text{mV s}^{-1}$ , 100  $\text{mV s}^{-1}$ , 200  $\text{mV s}^{-1}$  and 400  $\text{mV s}^{-1}$ , respectively.

## 5. Electrochemical properties of OCBzC and TCBzC.

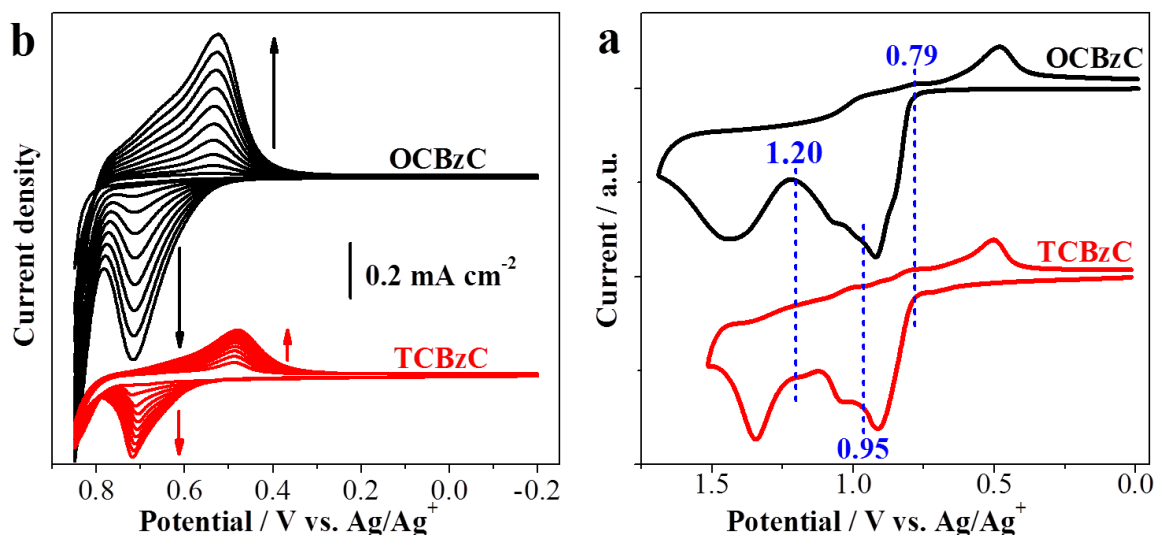

**Fig. S4.** a) CV of **OCBzC** and **TCBzC** for the first cycle. b) CV curves for the polymerization of **OCBzC** ( $0.17 \text{ mmol L}^{-1}$ ) and **TCBzC** ( $0.34 \text{ mmol L}^{-1}$ ) at the scan rate  $50 \text{ mV s}^{-1}$  and the scan rang  $-0.20 \text{ V} \sim 0.85 \text{ V}$  for 10 cycles using  $\text{Bu}_4\text{NPF}_6$  ( $0.1 \text{ mol L}^{-1}$ ) as supporting electrolyte. The oxidation of carbazole, fluorene and 2, 1, 3-benzothiadiazole (BTz) unit occur at  $0.79 \text{ V}$ ,  $0.95 \text{ V}$  and  $1.20 \text{ V}$ , implying the emission center (backbone) will not be affected in the EP process at the potential below  $0.95 \text{ V}$ . Similar to the comparison of **OCPC** and **TCPC**, the film growth rate of **OCBzC** is enhanced by ca. 2 times compared with **TCBzC**.

## References

- S1. L. Yao, S. Xue, Q. Wang, W. Dong, W. Yang, H. Wu, M. Zhang, B. Yang, Y. Ma\*, *Chem. Eur. J.*, 2012, **18**, 2707-2714.  
S2. S. Tang, M. Liu, P. Lu, H. Xia, M. Li, Z. Xie, F. Shen, C. Gu, H. Wang, B. Yang, Y. Ma\*, *Adv. Funct. Mater.*, 2007, **17**, 2869-2877.
